# Supplementary material
Source: PubMed Central journal article supplement (PMC7719023)
Supplement: awaa302_supplementary_data.pdf [file awaa302_supplementary_data.pdf]

Supplementary Table 1 association of rs34331204 variant with AD risk in different datasets

| SNP        | EA | NEA | EAF | Beta    | SE     | <i>P</i> value | Phenotype                                             |
|------------|----|-----|-----|---------|--------|----------------|-------------------------------------------------------|
| rs34331204 | C  | A   | -   | 0.0186  | 0.0271 | 0.492          | AD (Kunkle <i>et al.</i> , 2019a)                     |
| rs34331204 | C  | A   | -   | -0.0042 | 0.0123 | 0.732          | Maternal history of AD (Marioni <i>et al.</i> , 2018) |
| rs34331204 | C  | A   | -   | 0.0335  | 0.0168 | 0.046          | Paternal history of AD (Marioni <i>et al.</i> , 2018) |

EA, effect allele; NEA, non-effect allele; EAF, effect allele frequency; Beta is the regression coefficient based on the effect allele. Beta > 0 and Beta < 0 means that this effect allele increase and reduce disease or phenotype, respectively. The threshold of statistical significance for association analysis was  $P < 0.05$ .
